# Supplementary material for: Infrared photodissociation spectroscopy of mass-selected [TaO3(CO2)n]+ (n = 2–5) complexes in the gas phase
Source: Royal Society of Chemistry journal article supplement (doi:10.1039/d3cp01384g), 2023-01-01
Supplement: d3cp01384g1.pdf [file d3cp01384g1.pdf]

Supporting information for

## **Infrared Photodissociation Spectroscopy of Mass-Selected [TaO<sub>3</sub>(CO<sub>2</sub>)<sub>n</sub>]<sup>+</sup> (n = 2–5) Complexes in the Gas Phase**

Jia Han,<sup>1,†</sup> Yang Yang,<sup>2,†</sup> Binglin Qiu,<sup>1,†</sup> Pengcheng Liu,<sup>1</sup> Xiangkun Wu,<sup>3</sup>

Guanjun Wang,<sup>2,\*</sup> Shilin Liu,<sup>1</sup> Xiaoguo Zhou<sup>1,\*</sup>

1. *Hefei National Laboratory for Physical Sciences at the Microscale, Department of Chemical Physics, University of Science and Technology of China, Hefei, Anhui 230026, China*
2. *Department of Chemistry, Fudan University, Shanghai, 200433, China*
3. *Paul Scherrer Institute, 5232 Villigen, Switzerland*

### **Contents:**

**Figure S1.** Optimized geometries of the [TaO<sub>3</sub>(CO<sub>2</sub>)<sub>2</sub>]<sup>+</sup> complex isomers in the singlet and triplet states calculated at the PBE0-D3(BJ)/def2-TZVP level of theory (bond lengths in Ångströms and bond angles in degrees).

**Figure S2.** Optimized geometries of the [TaO<sub>3</sub>(CO<sub>2</sub>)<sub>3</sub>]<sup>+</sup> complex isomers in the singlet and triplet states calculated at the PBE0-D3(BJ)/def2-TZVP level of theory (bond lengths in Ångströms and bond angles in degrees).

**Figure S3.** Optimized geometries of the [TaO<sub>3</sub>(CO<sub>2</sub>)<sub>4</sub>]<sup>+</sup> complex isomers in the singlet and triplet states calculated at the PBE0-D3(BJ)/def2-TZVP level of theory (bond lengths in Ångströms and bond angles in degrees).

**Figure S4.** Optimized geometries of the [TaO<sub>3</sub>(CO<sub>2</sub>)<sub>5</sub>]<sup>+</sup> complex isomers in the singlet and triplet states calculated at the PBE0-D3(BJ)/def2-TZVP level of theory (bond lengths in Ångströms and bond angles in degrees).

**Figure S5.** Relative energies (in kcal/mol) of the [TaO<sub>3</sub>(CO<sub>2</sub>)<sub>n</sub>]<sup>+</sup> (n=2-5) complexes in the singlet and quintet states calculated at the PBE0-D3(BJ)/def2-TZVP level

of theory (bond lengths in Ångströms and bond angles in degrees).

**Table S1.** Binding energies of successive CO<sub>2</sub> ligands calculated for the singlet and triplet complex isomers at the PBE0-D3(BJ)/def2-TZVP level of theory (in kcal/mol).

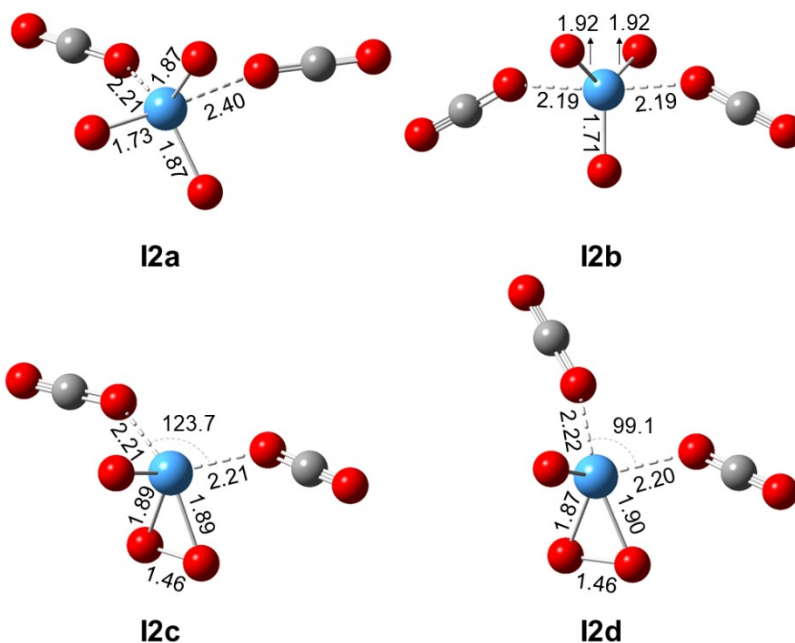

**Figure S1.** Optimized geometries of the  $[\text{TaO}_3(\text{CO}_2)_2]^+$  complex isomers in the singlet and triplet states calculated at the PBE0-D3(BJ)/def2-TZVP level of theory (bond lengths in Ångströms and bond angles in degrees).

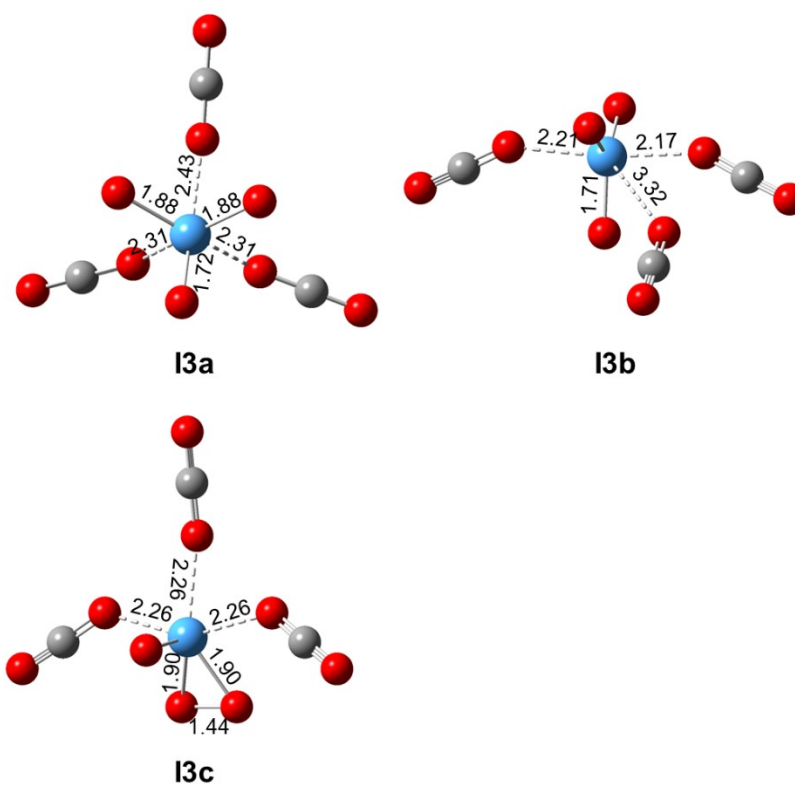

**Figure S2.** Optimized geometries of the  $[\text{TaO}_3(\text{CO}_2)_3]^+$  complex isomers in the singlet and triplet states calculated at the PBE0-D3(BJ)/def2-TZVP level of theory (bond lengths in Ångströms and bond angles in degrees).

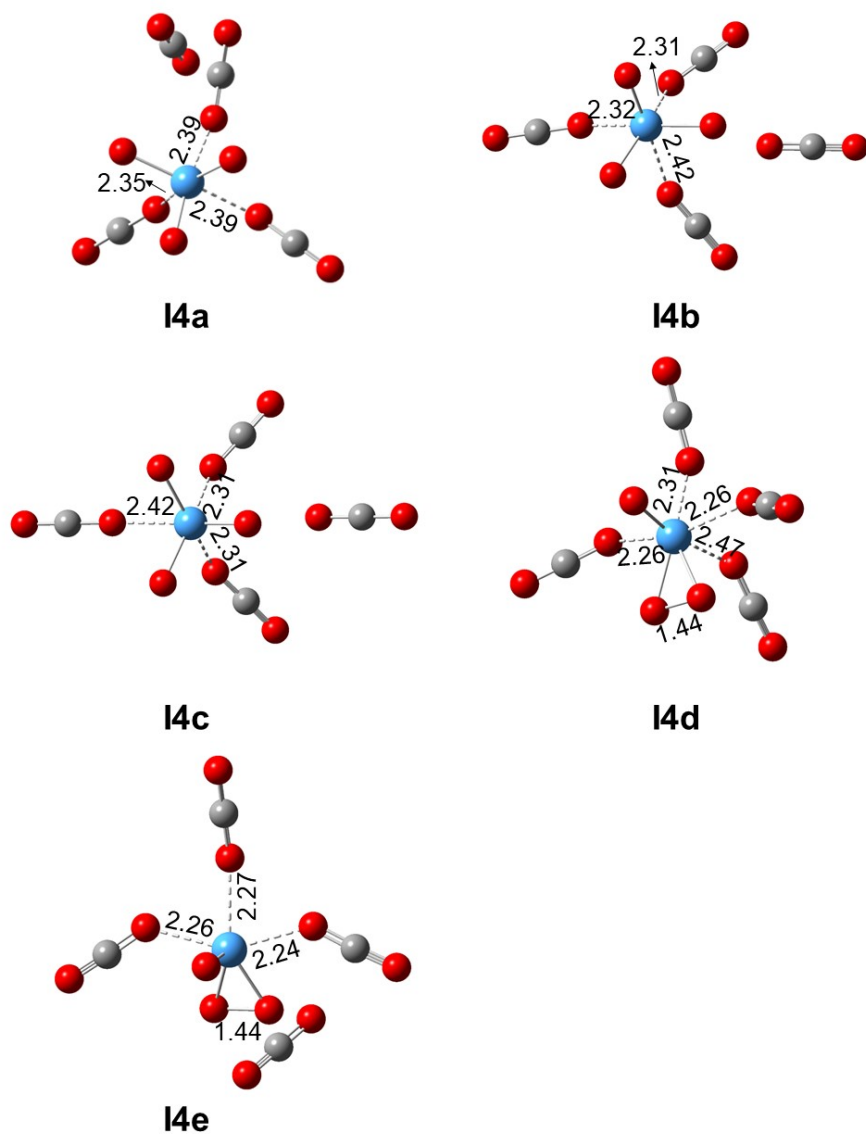

**Figure S3.** Optimized geometries of the  $[\text{TaO}_3(\text{CO}_2)_4]^+$  complex isomers in the singlet and triplet states calculated at the PBE0-D3(BJ)/def2-TZVP level of theory (bond lengths in Ångströms and bond angles in degrees).

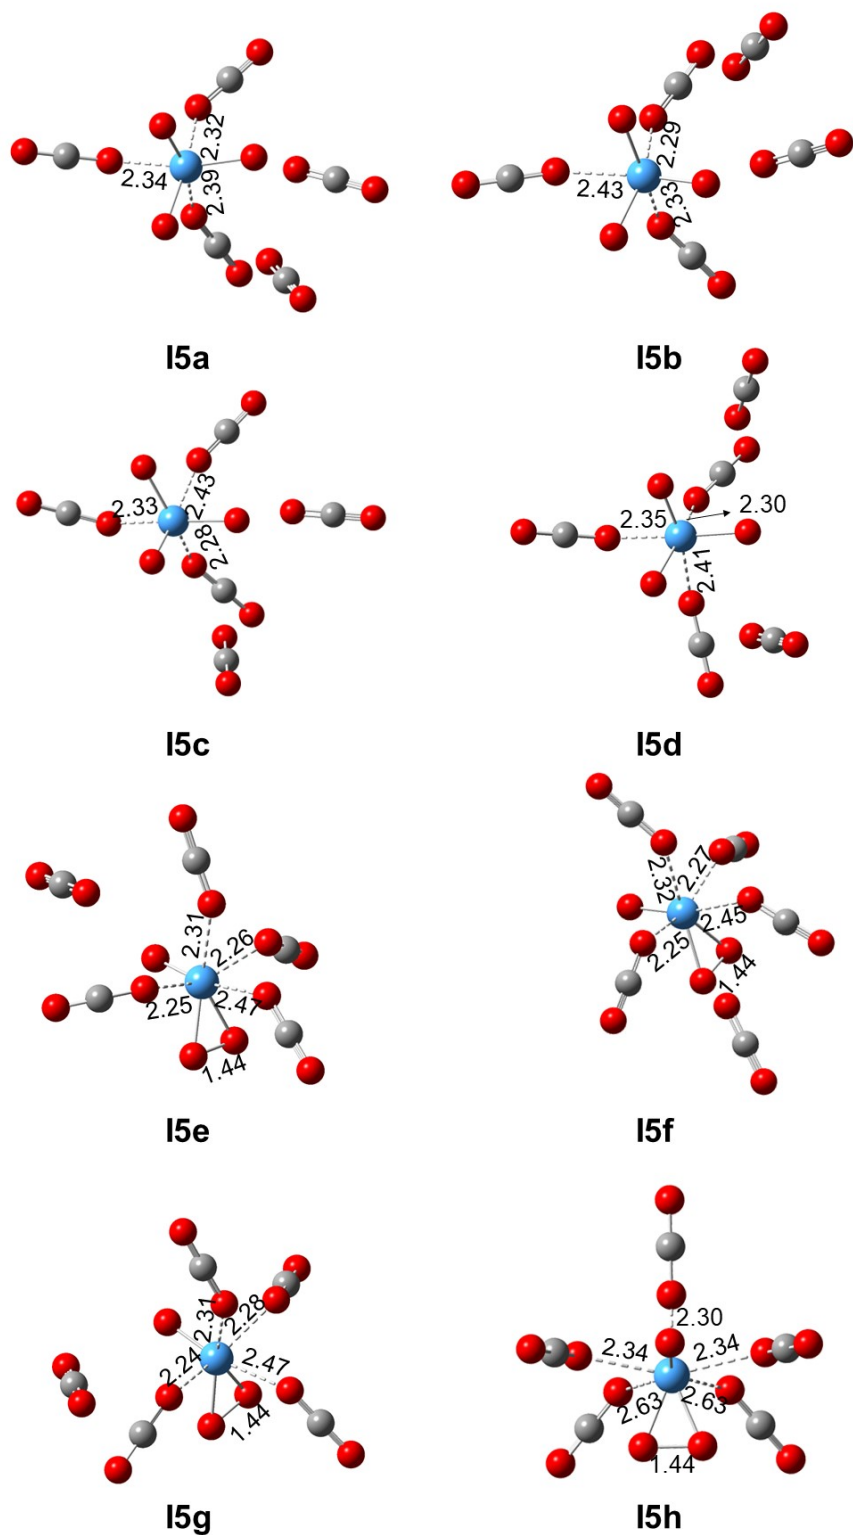

**Figure S4.** Optimized geometries of the  $[\text{TaO}_3(\text{CO}_2)_5]^+$  complex isomers in the singlet and triplet states calculated at the PBE0-D3(BJ)/def2-TZVP level of theory (bond lengths in Ångströms and bond angles in degrees).

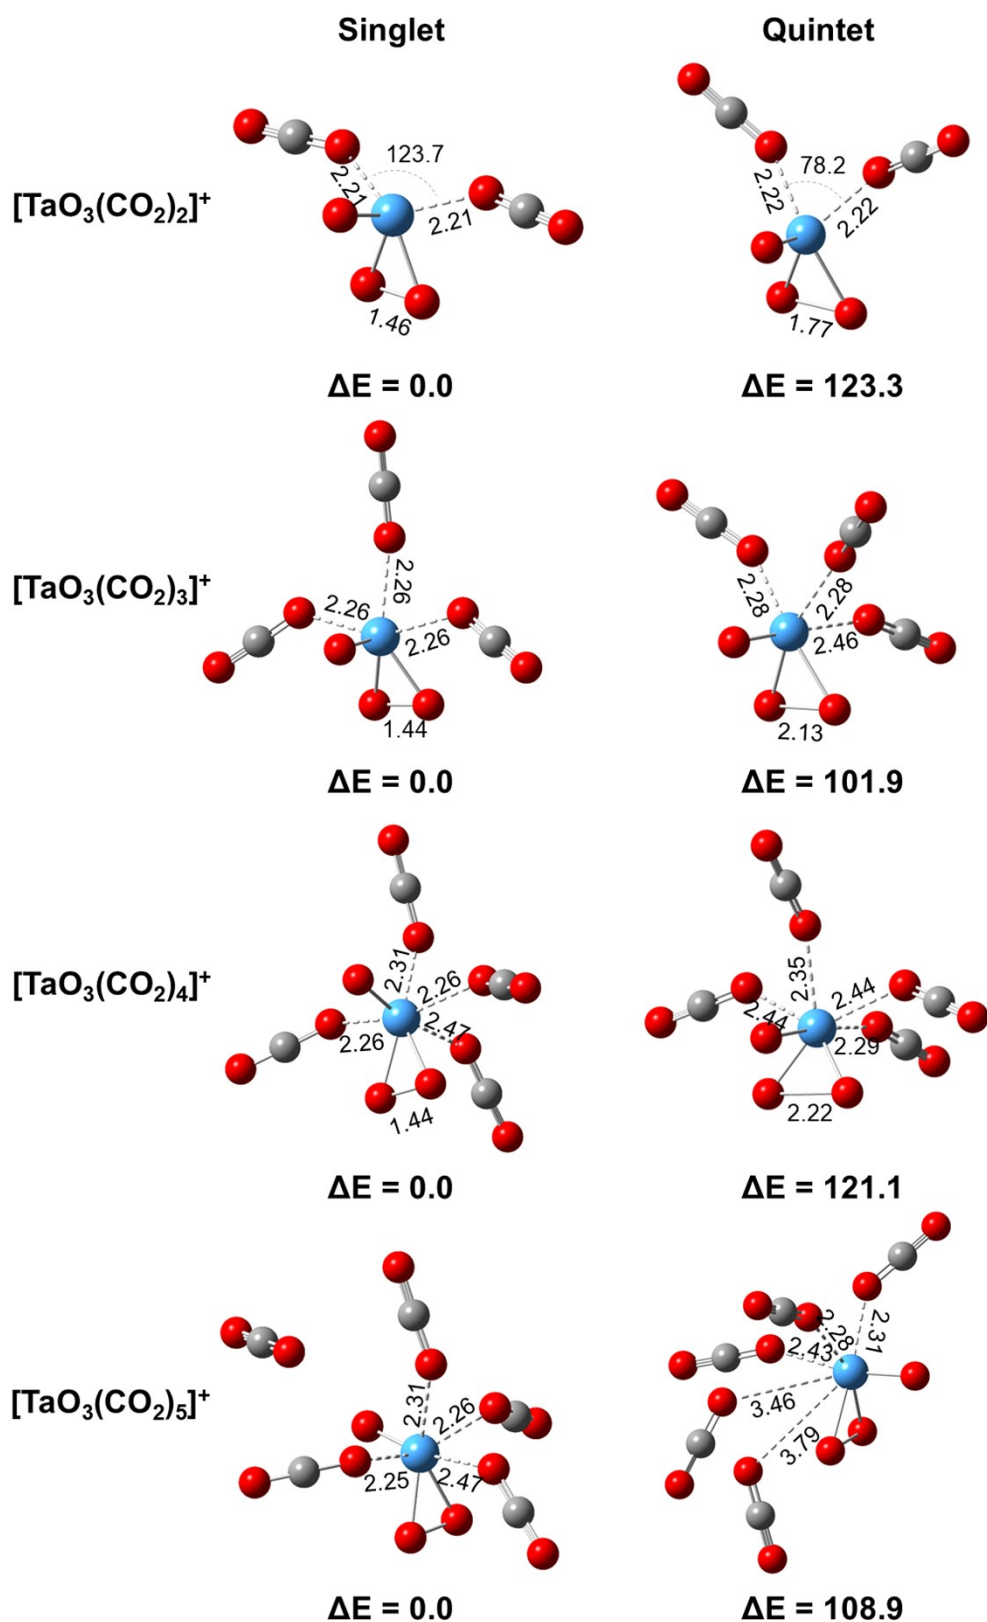

**Figure S5.** Relative energies (in kcal/mol) of the  $[\text{TaO}_3(\text{CO}_2)_n]^+$  ( $n=2-5$ ) complexes in the singlet and quintet states calculated at the PBE0-D3(BJ)/def2-TZVP level of theory (bond lengths in Ångströms and bond angles in degrees).

**Table S1.** Binding energies of successive CO<sub>2</sub> ligands calculated for the singlet and triplet complex isomers at the PBE0-D3(BJ)/def2-TZVP level of theory (in kcal/mol).

|                                                                                | Binding energy (kcal/mol) |         |
|--------------------------------------------------------------------------------|---------------------------|---------|
|                                                                                | singlet                   | triplet |
| TaO <sub>3</sub> (CO <sub>2</sub> ) <sup>+</sup> -CO <sub>2</sub>              | 29.5                      | 17.8    |
| TaO <sub>3</sub> (CO <sub>2</sub> ) <sub>2</sub> <sup>+</sup> -CO <sub>2</sub> | 20.2                      | 15.1    |
| TaO <sub>3</sub> (CO <sub>2</sub> ) <sub>3</sub> <sup>+</sup> -CO <sub>2</sub> | 12.8                      | 5.8     |
| TaO <sub>3</sub> (CO <sub>2</sub> ) <sub>4</sub> <sup>+</sup> -CO <sub>2</sub> | 5.6                       | 5.7     |
